# Supplementary material
Source: PubMed Central journal article supplement (PMC2996018)
Supplement: pp.110.161828_1.pdf [file pp.110.161828_1.pdf]

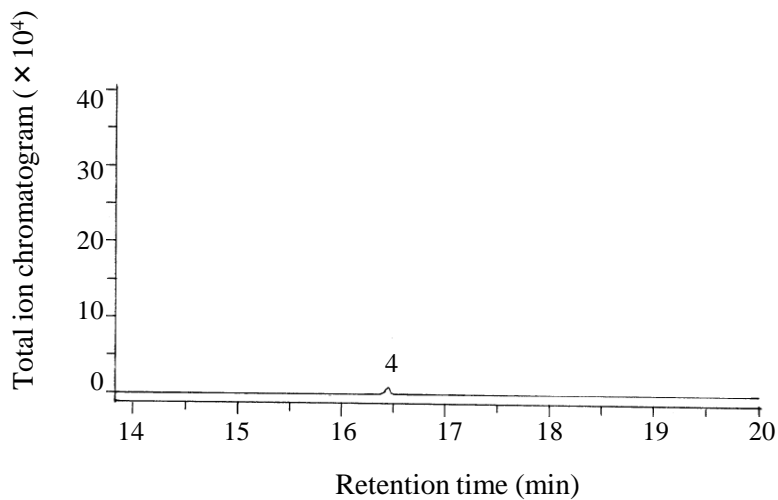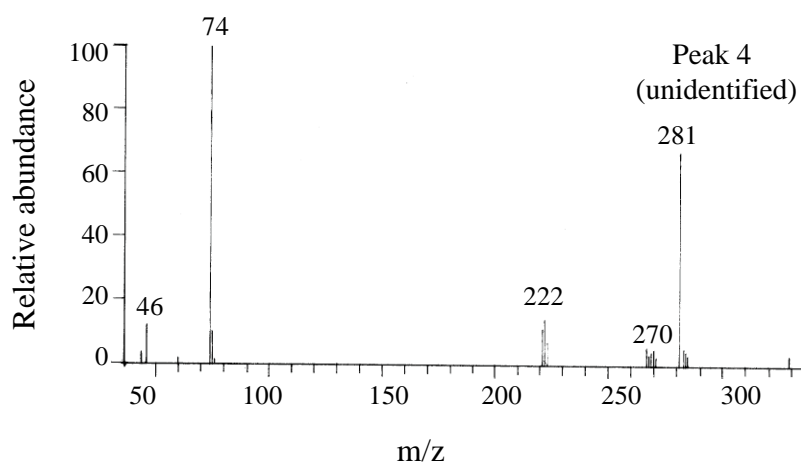

Supplemental Figure S1. Total ion chromatogram of control assay (extracts prepared from *E. coli* harboring a plasmid into which coding region of AcC2 was inserted in reverse), and mass spectrum of peak 4.

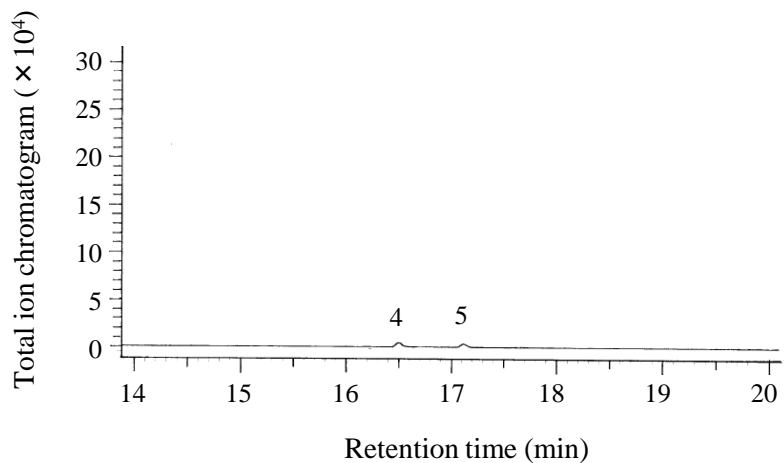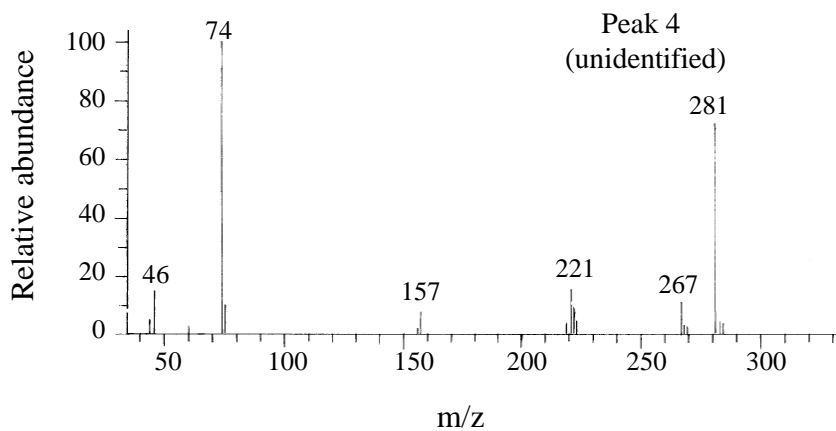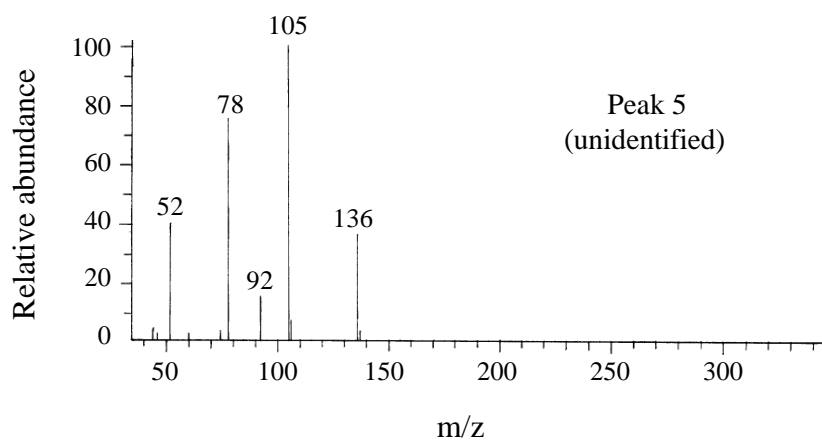

Supplemental Figure S2 Total ion chromatogram of control assay (the boiled enzymes of M42) and mass spectra of peaks 4 and 5.
